# Supplementary material for: Rab35 and glucocorticoids regulate APP and BACE1 trafficking to modulate Aβ production
Source: PubMed Central journal article supplement (PMC8651661; doi:10.1038/s41419-021-04433-w), 2021-12-08

Figure S1

**A**

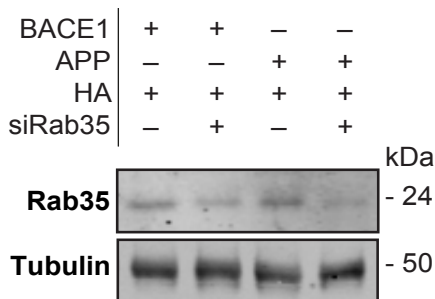

**B**

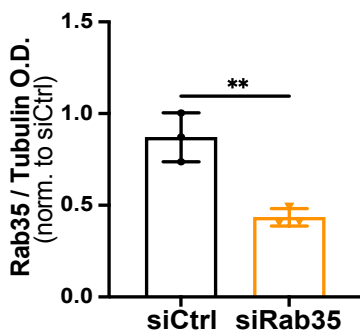

**C**

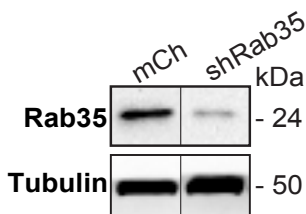

**D**

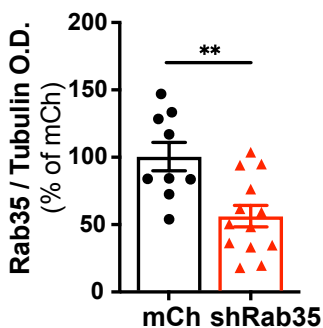

**E**

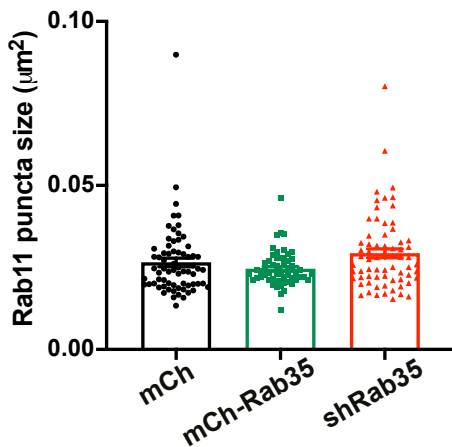

Figure S2

**A**

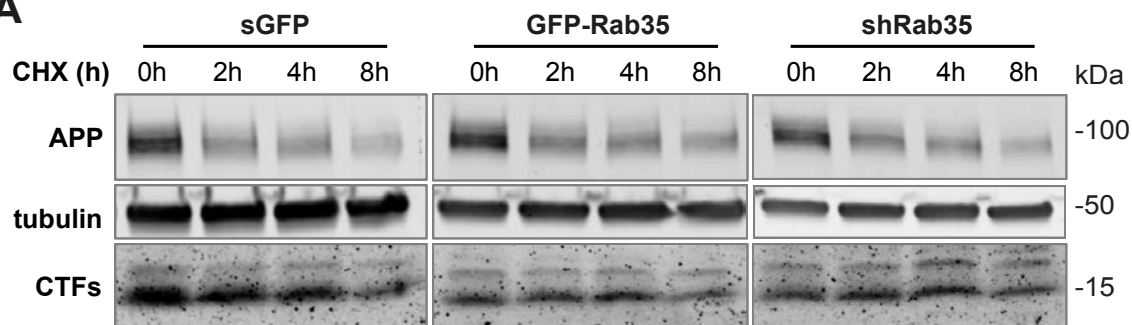

**B**

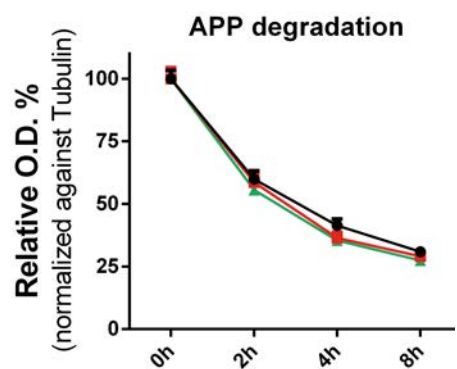

**C**

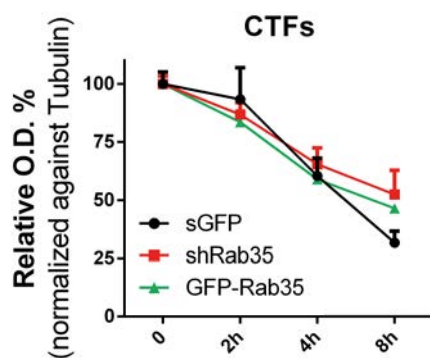

**D**

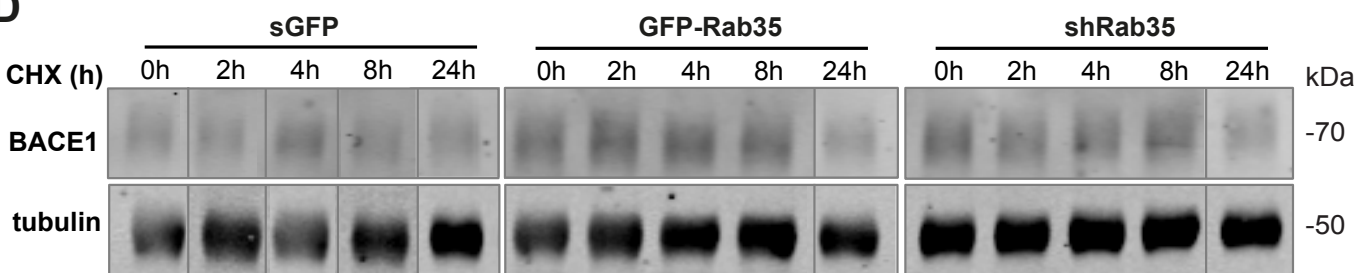

**E**

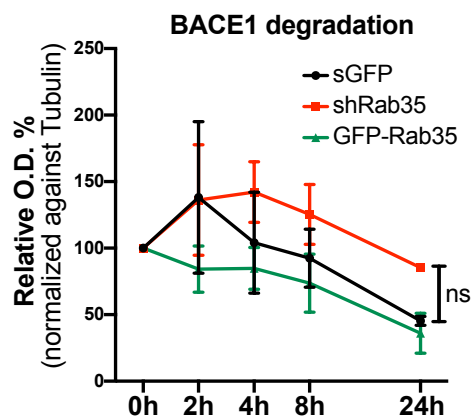

Figure S3

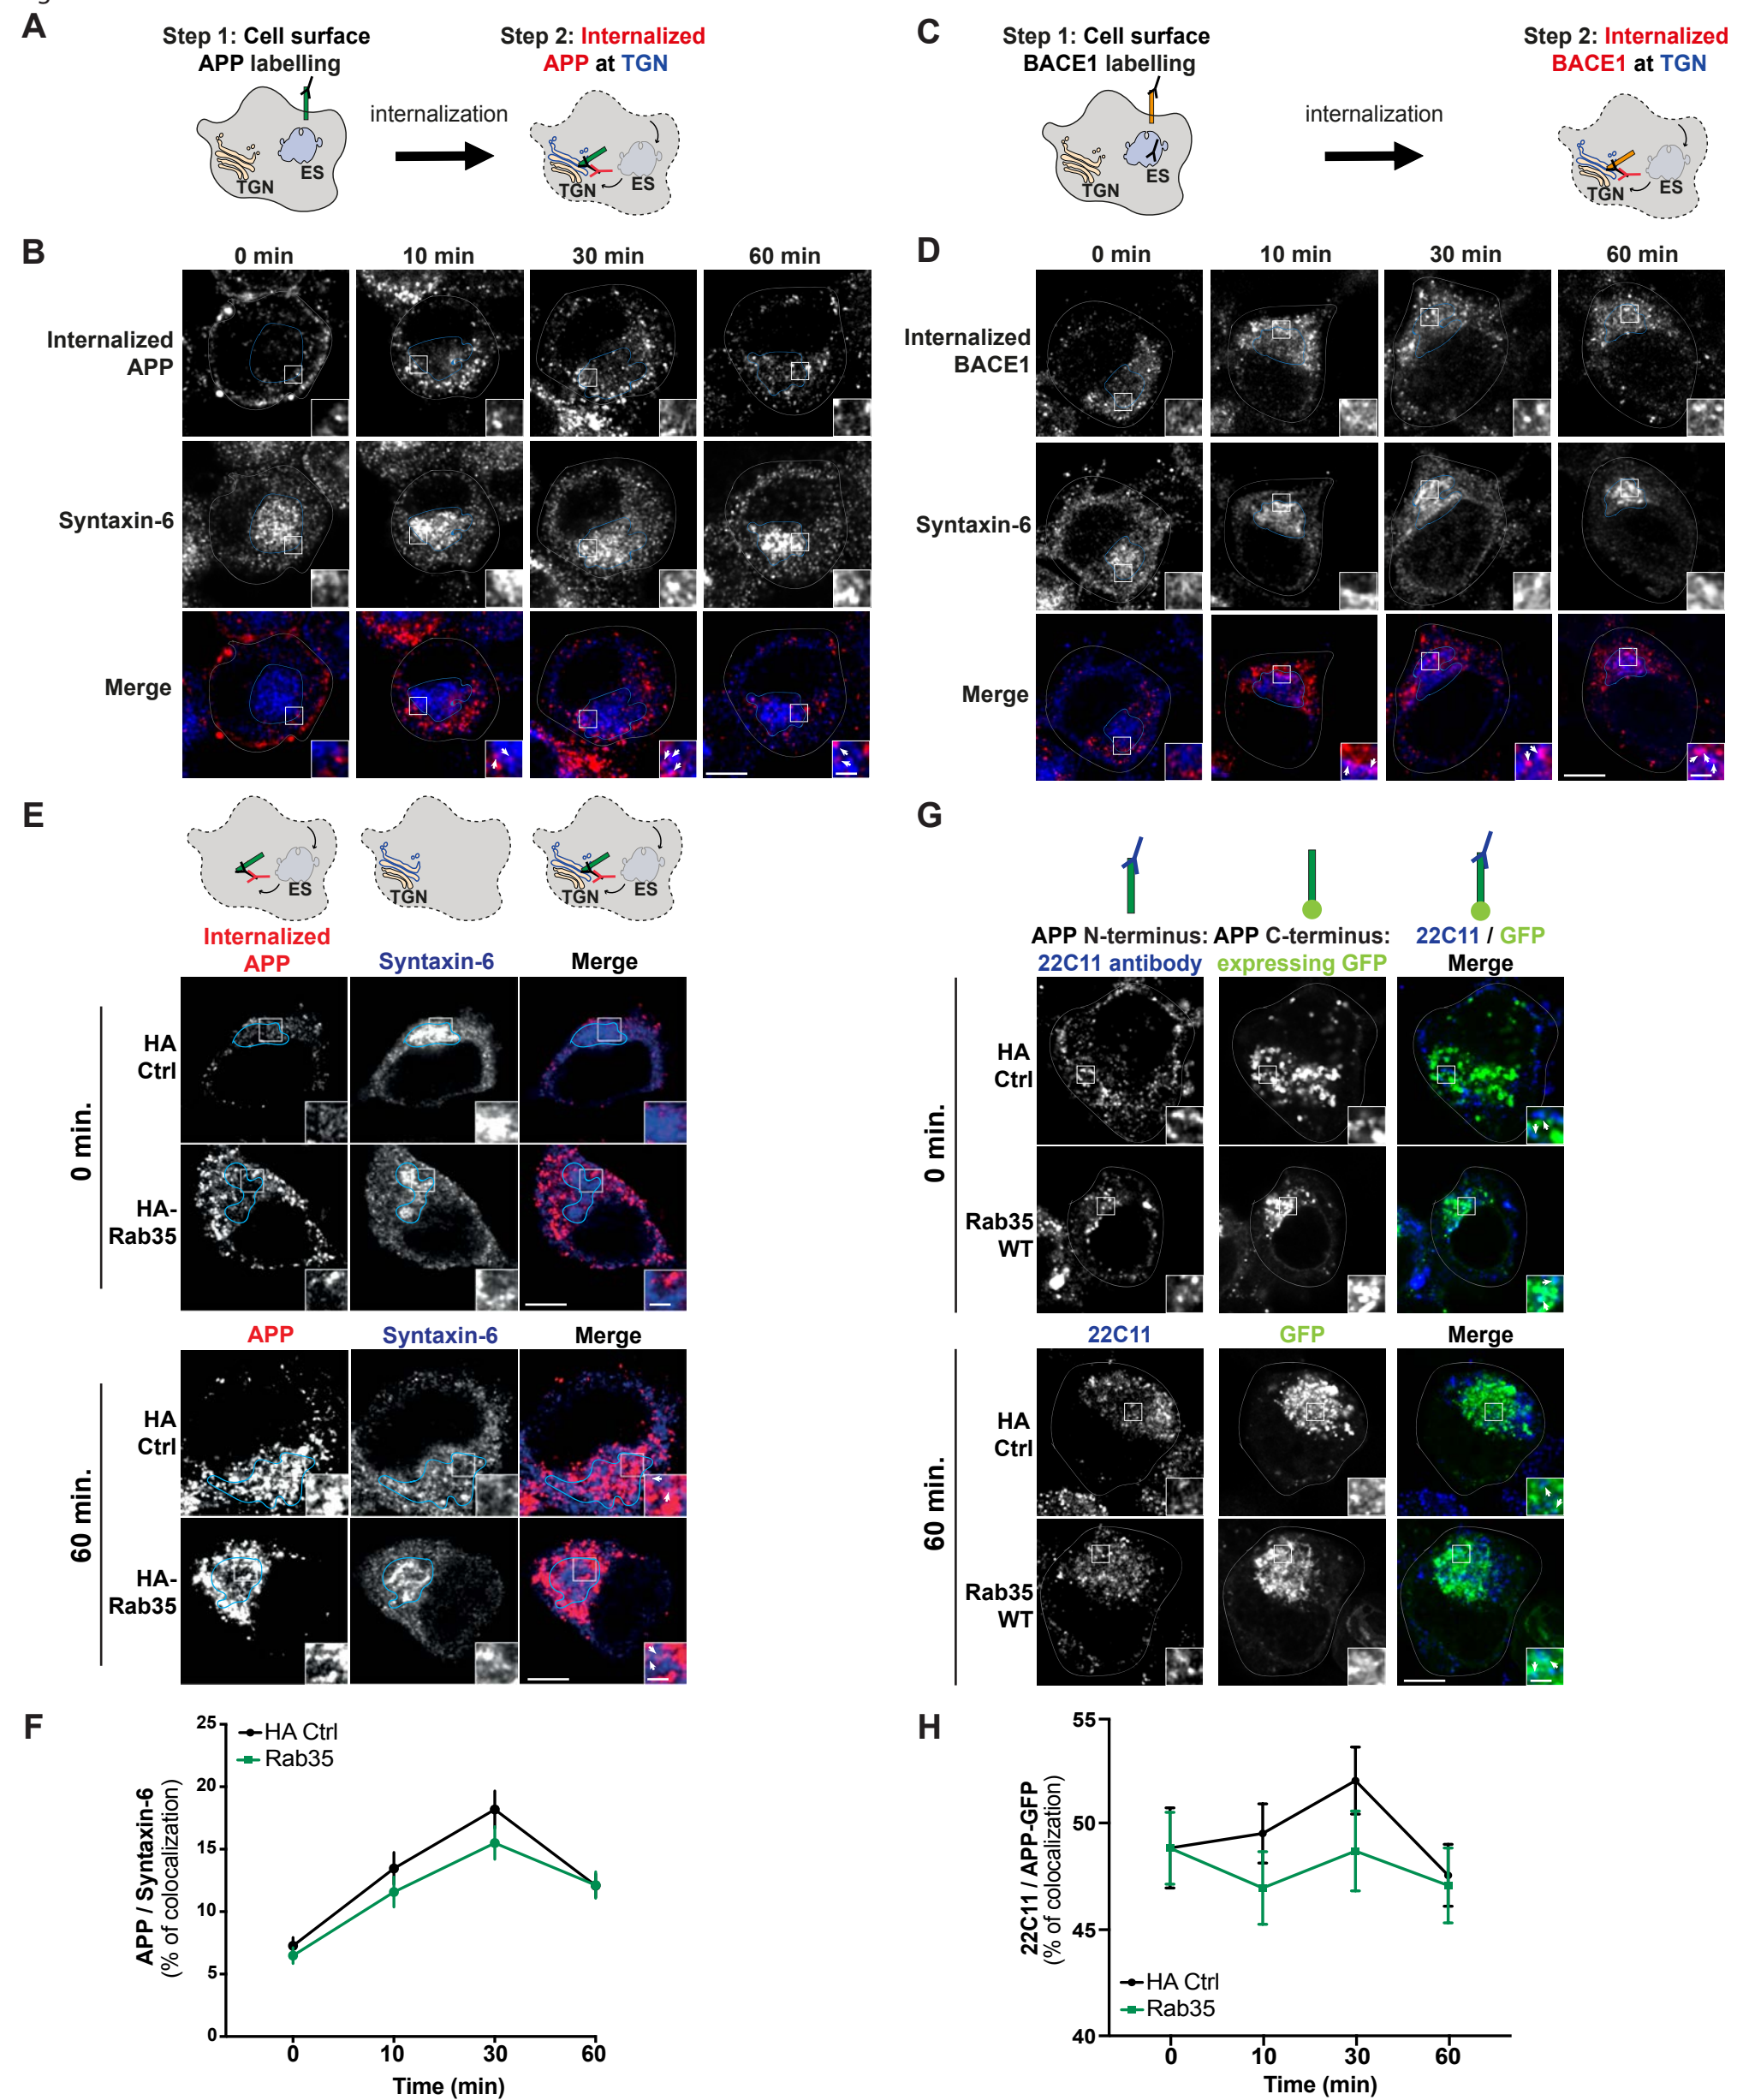

Figure S4

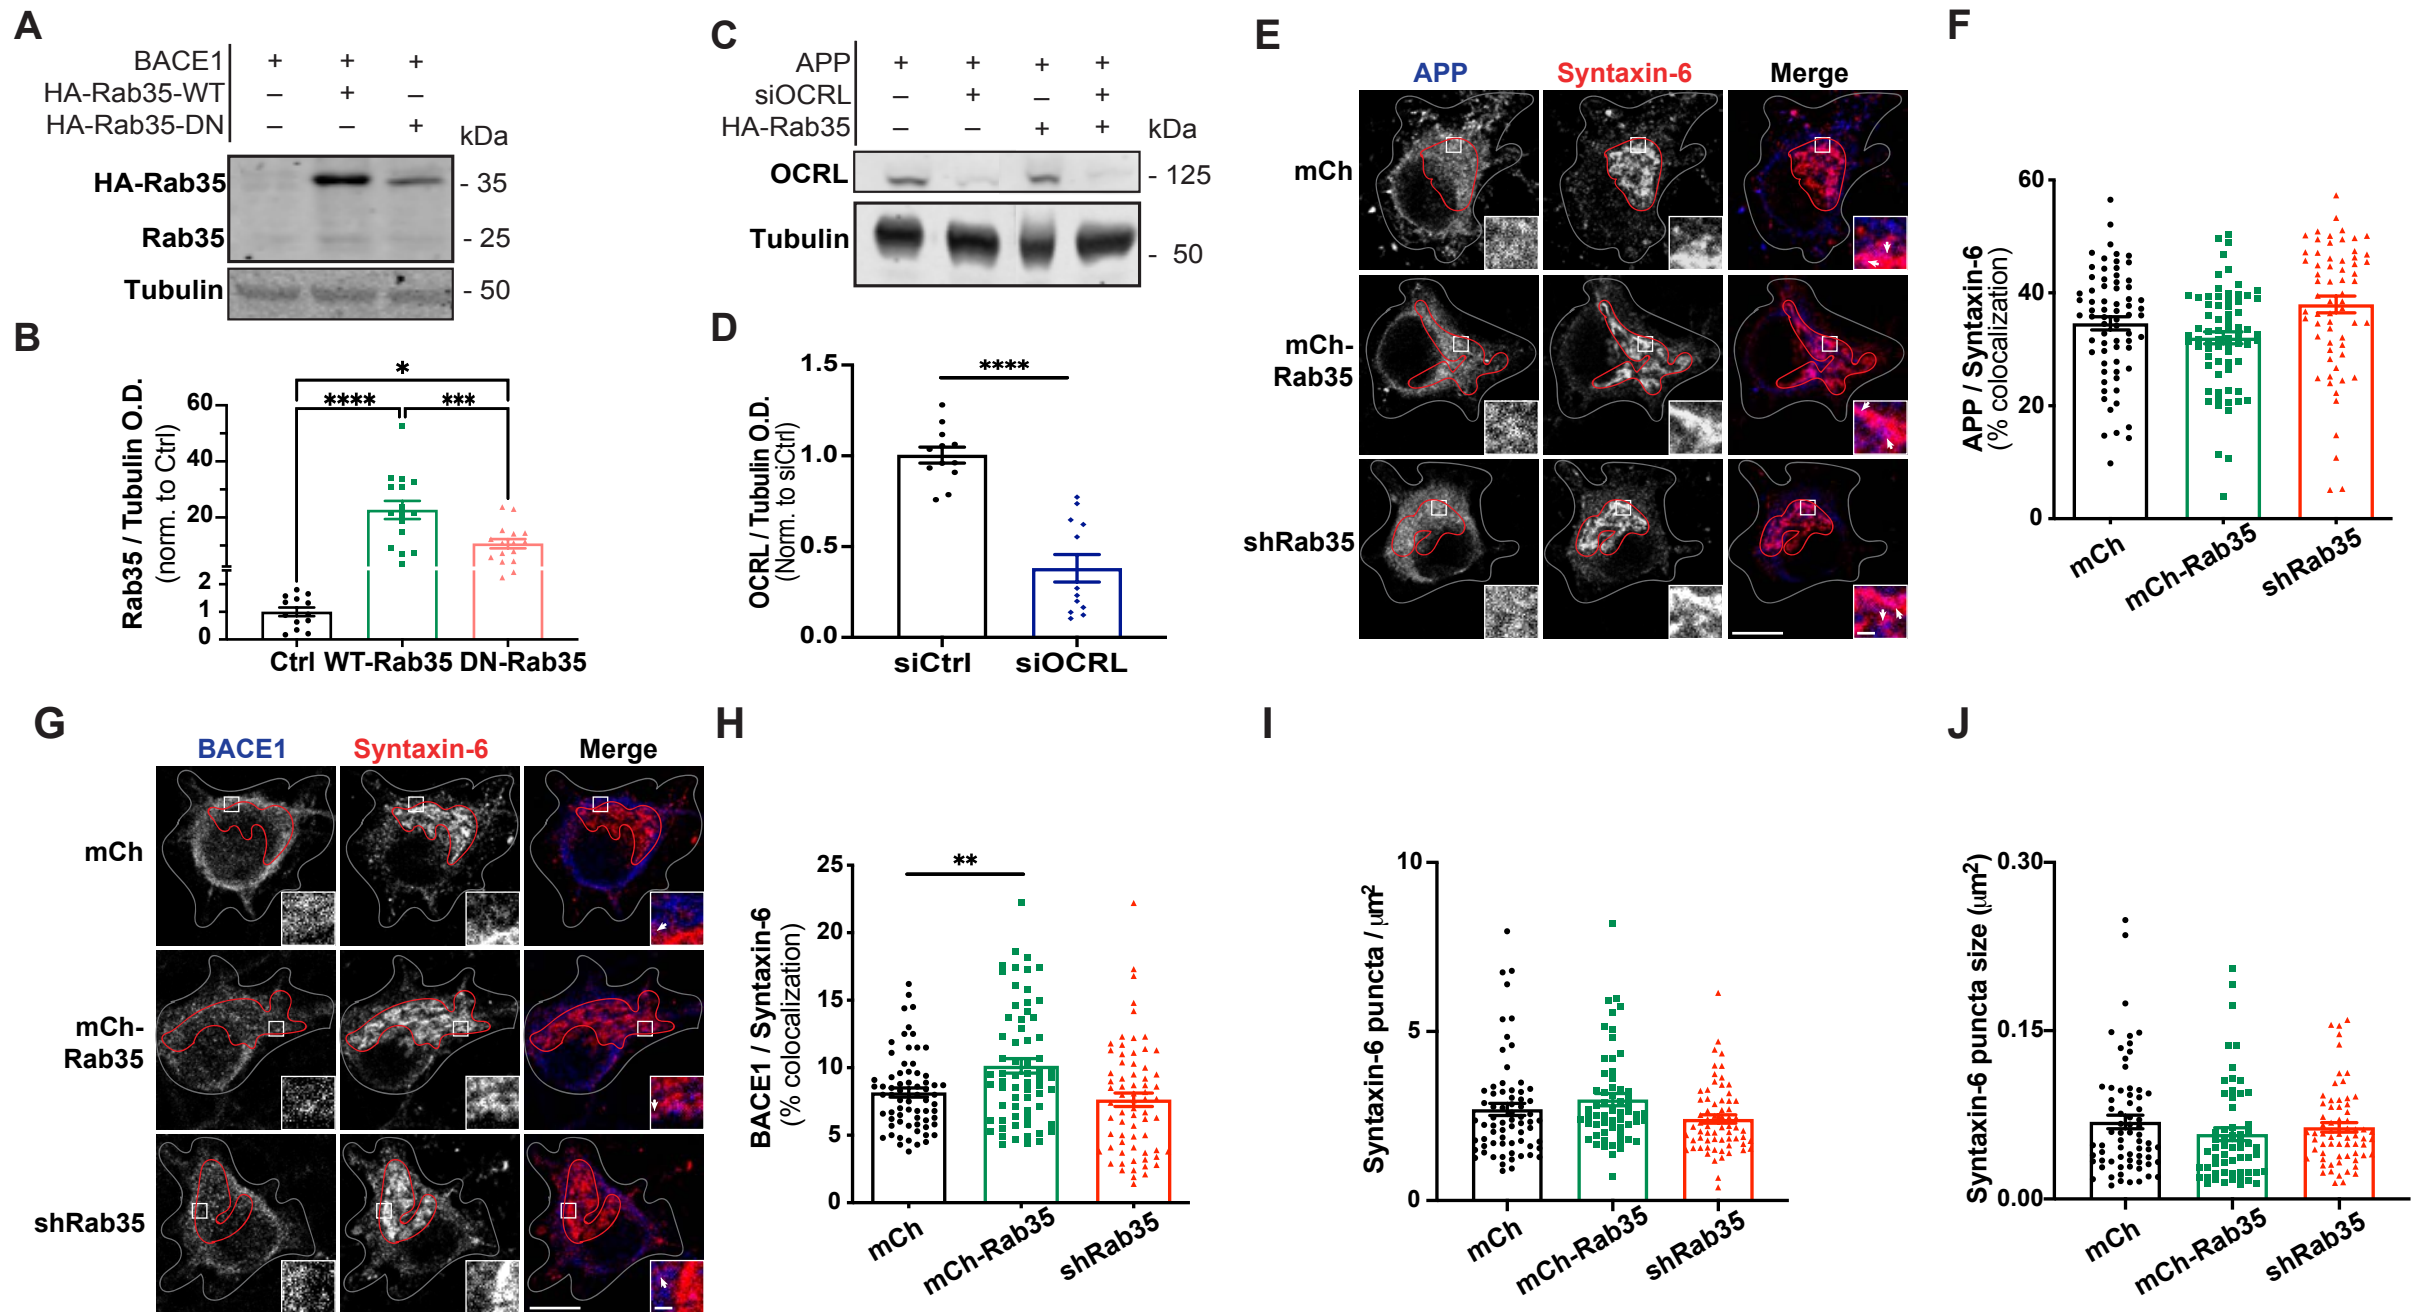



Figure S5

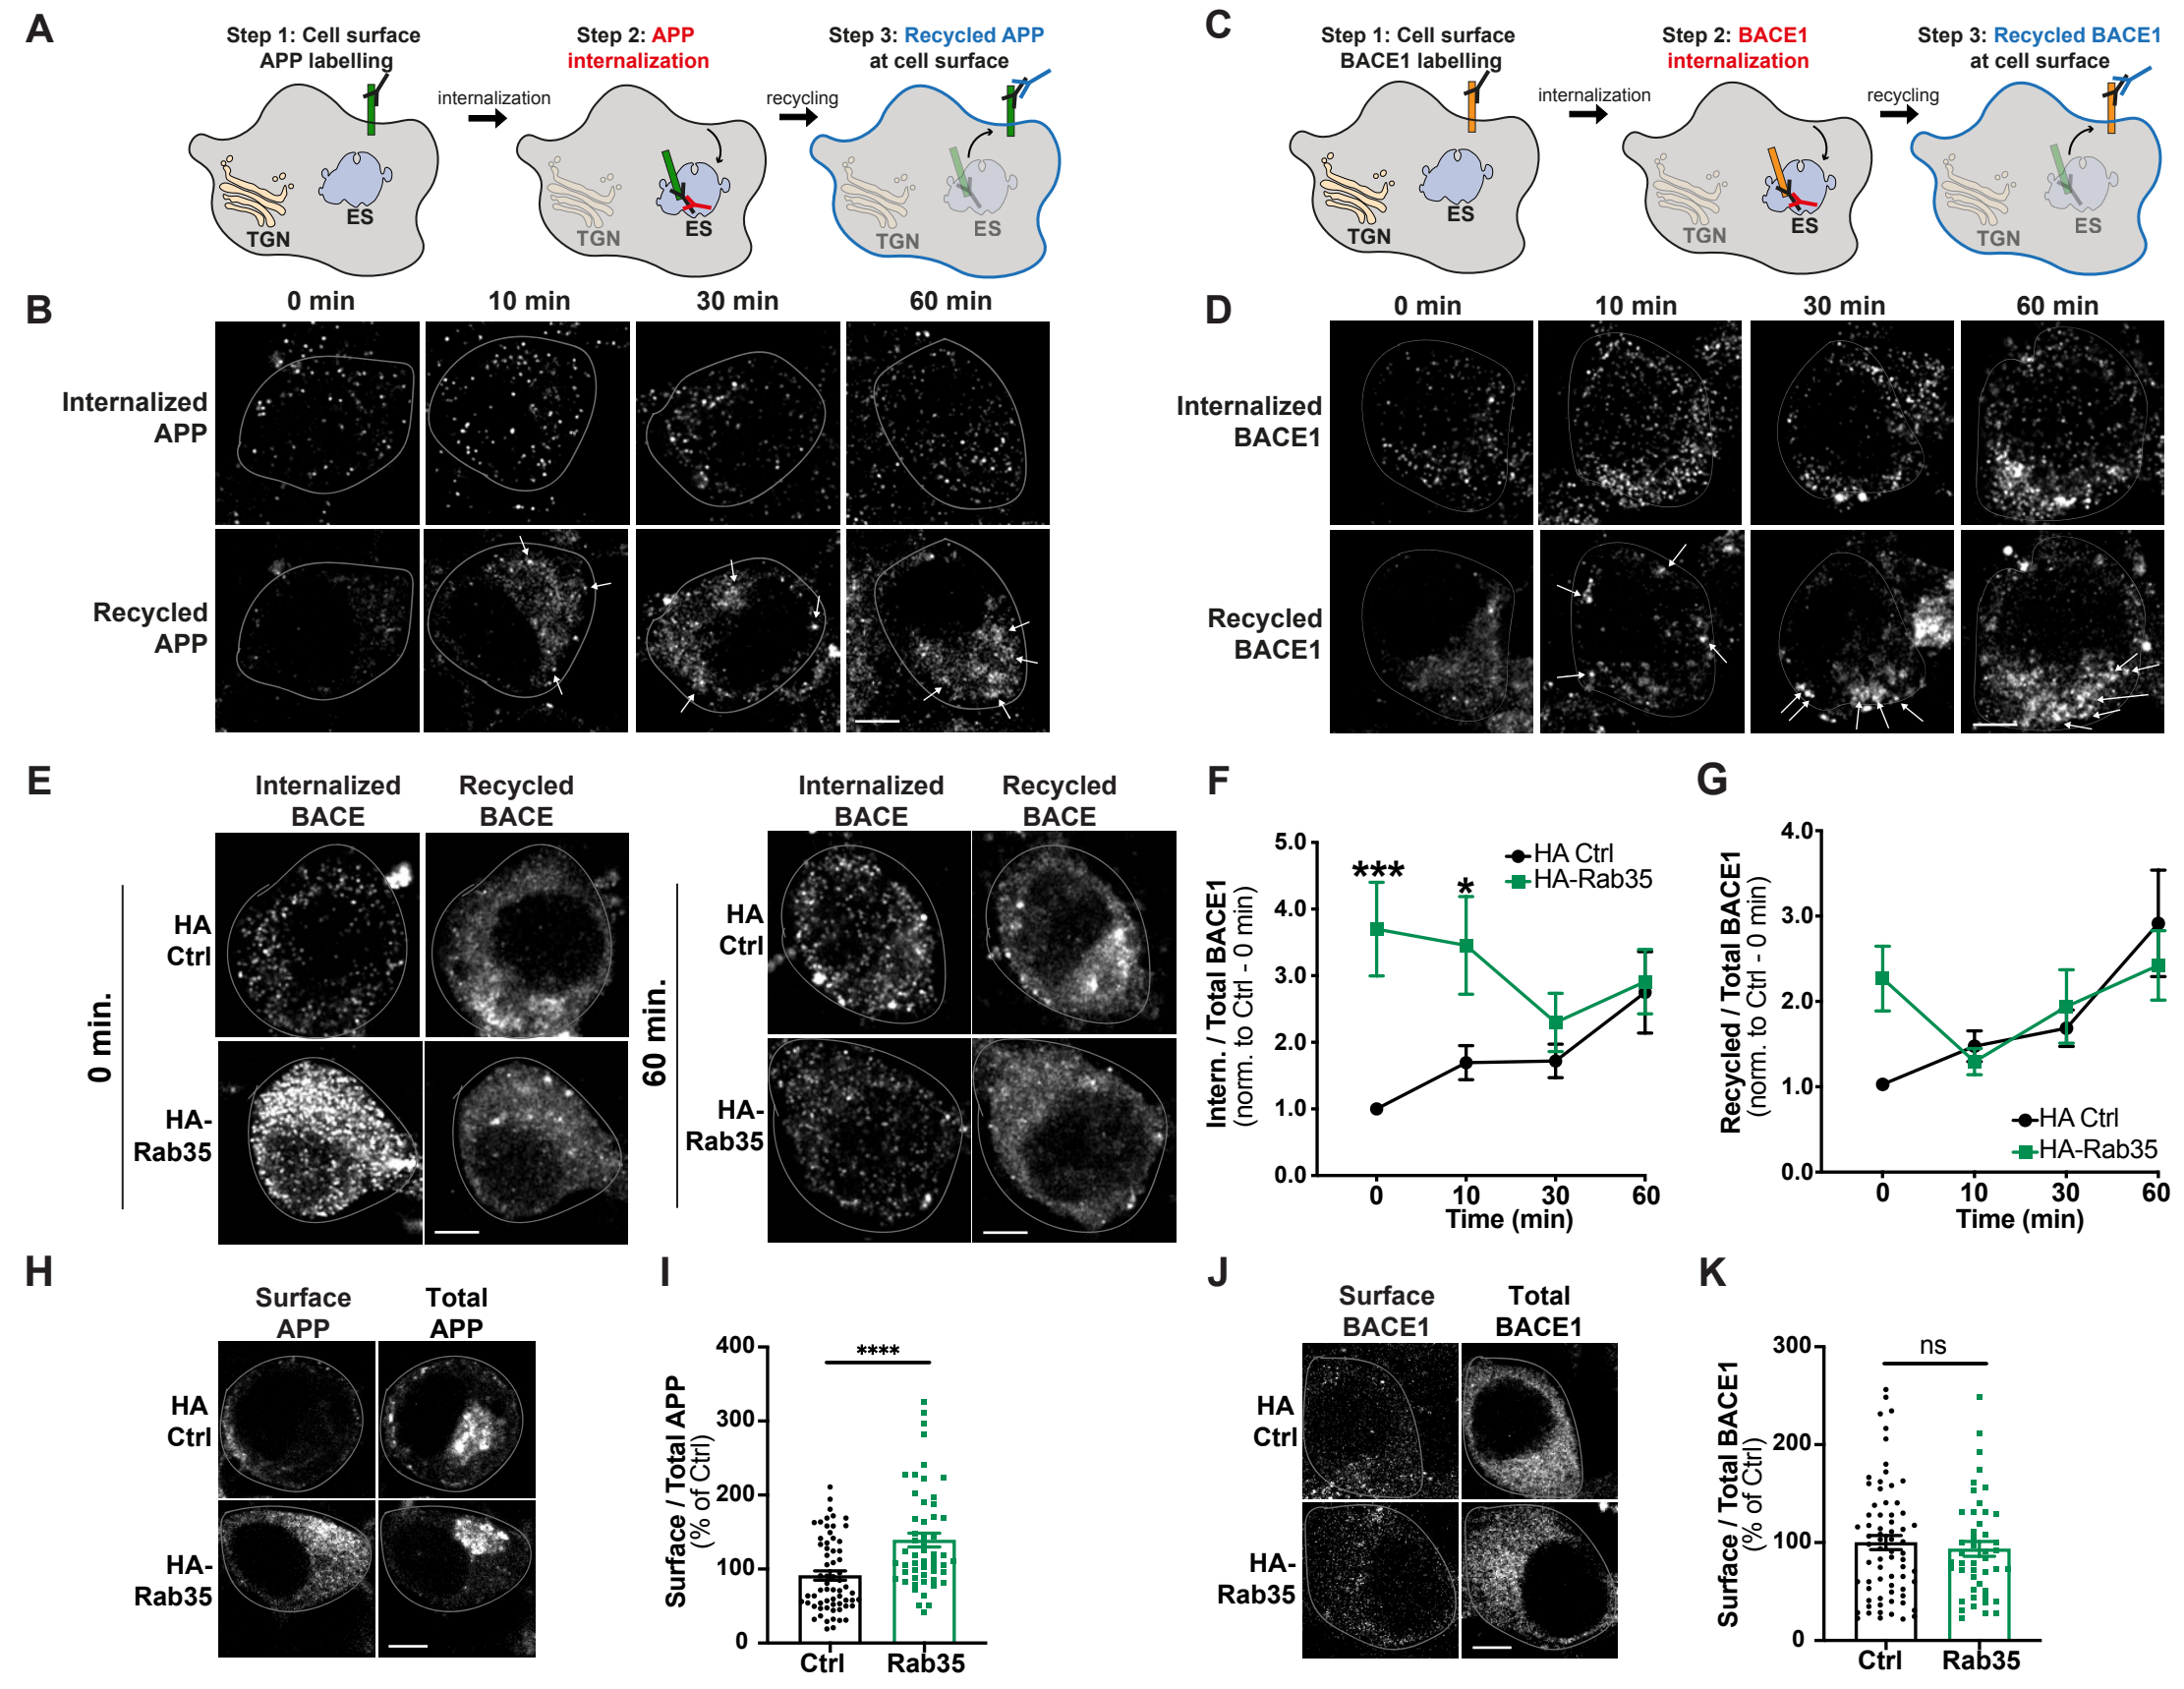

Figure S6

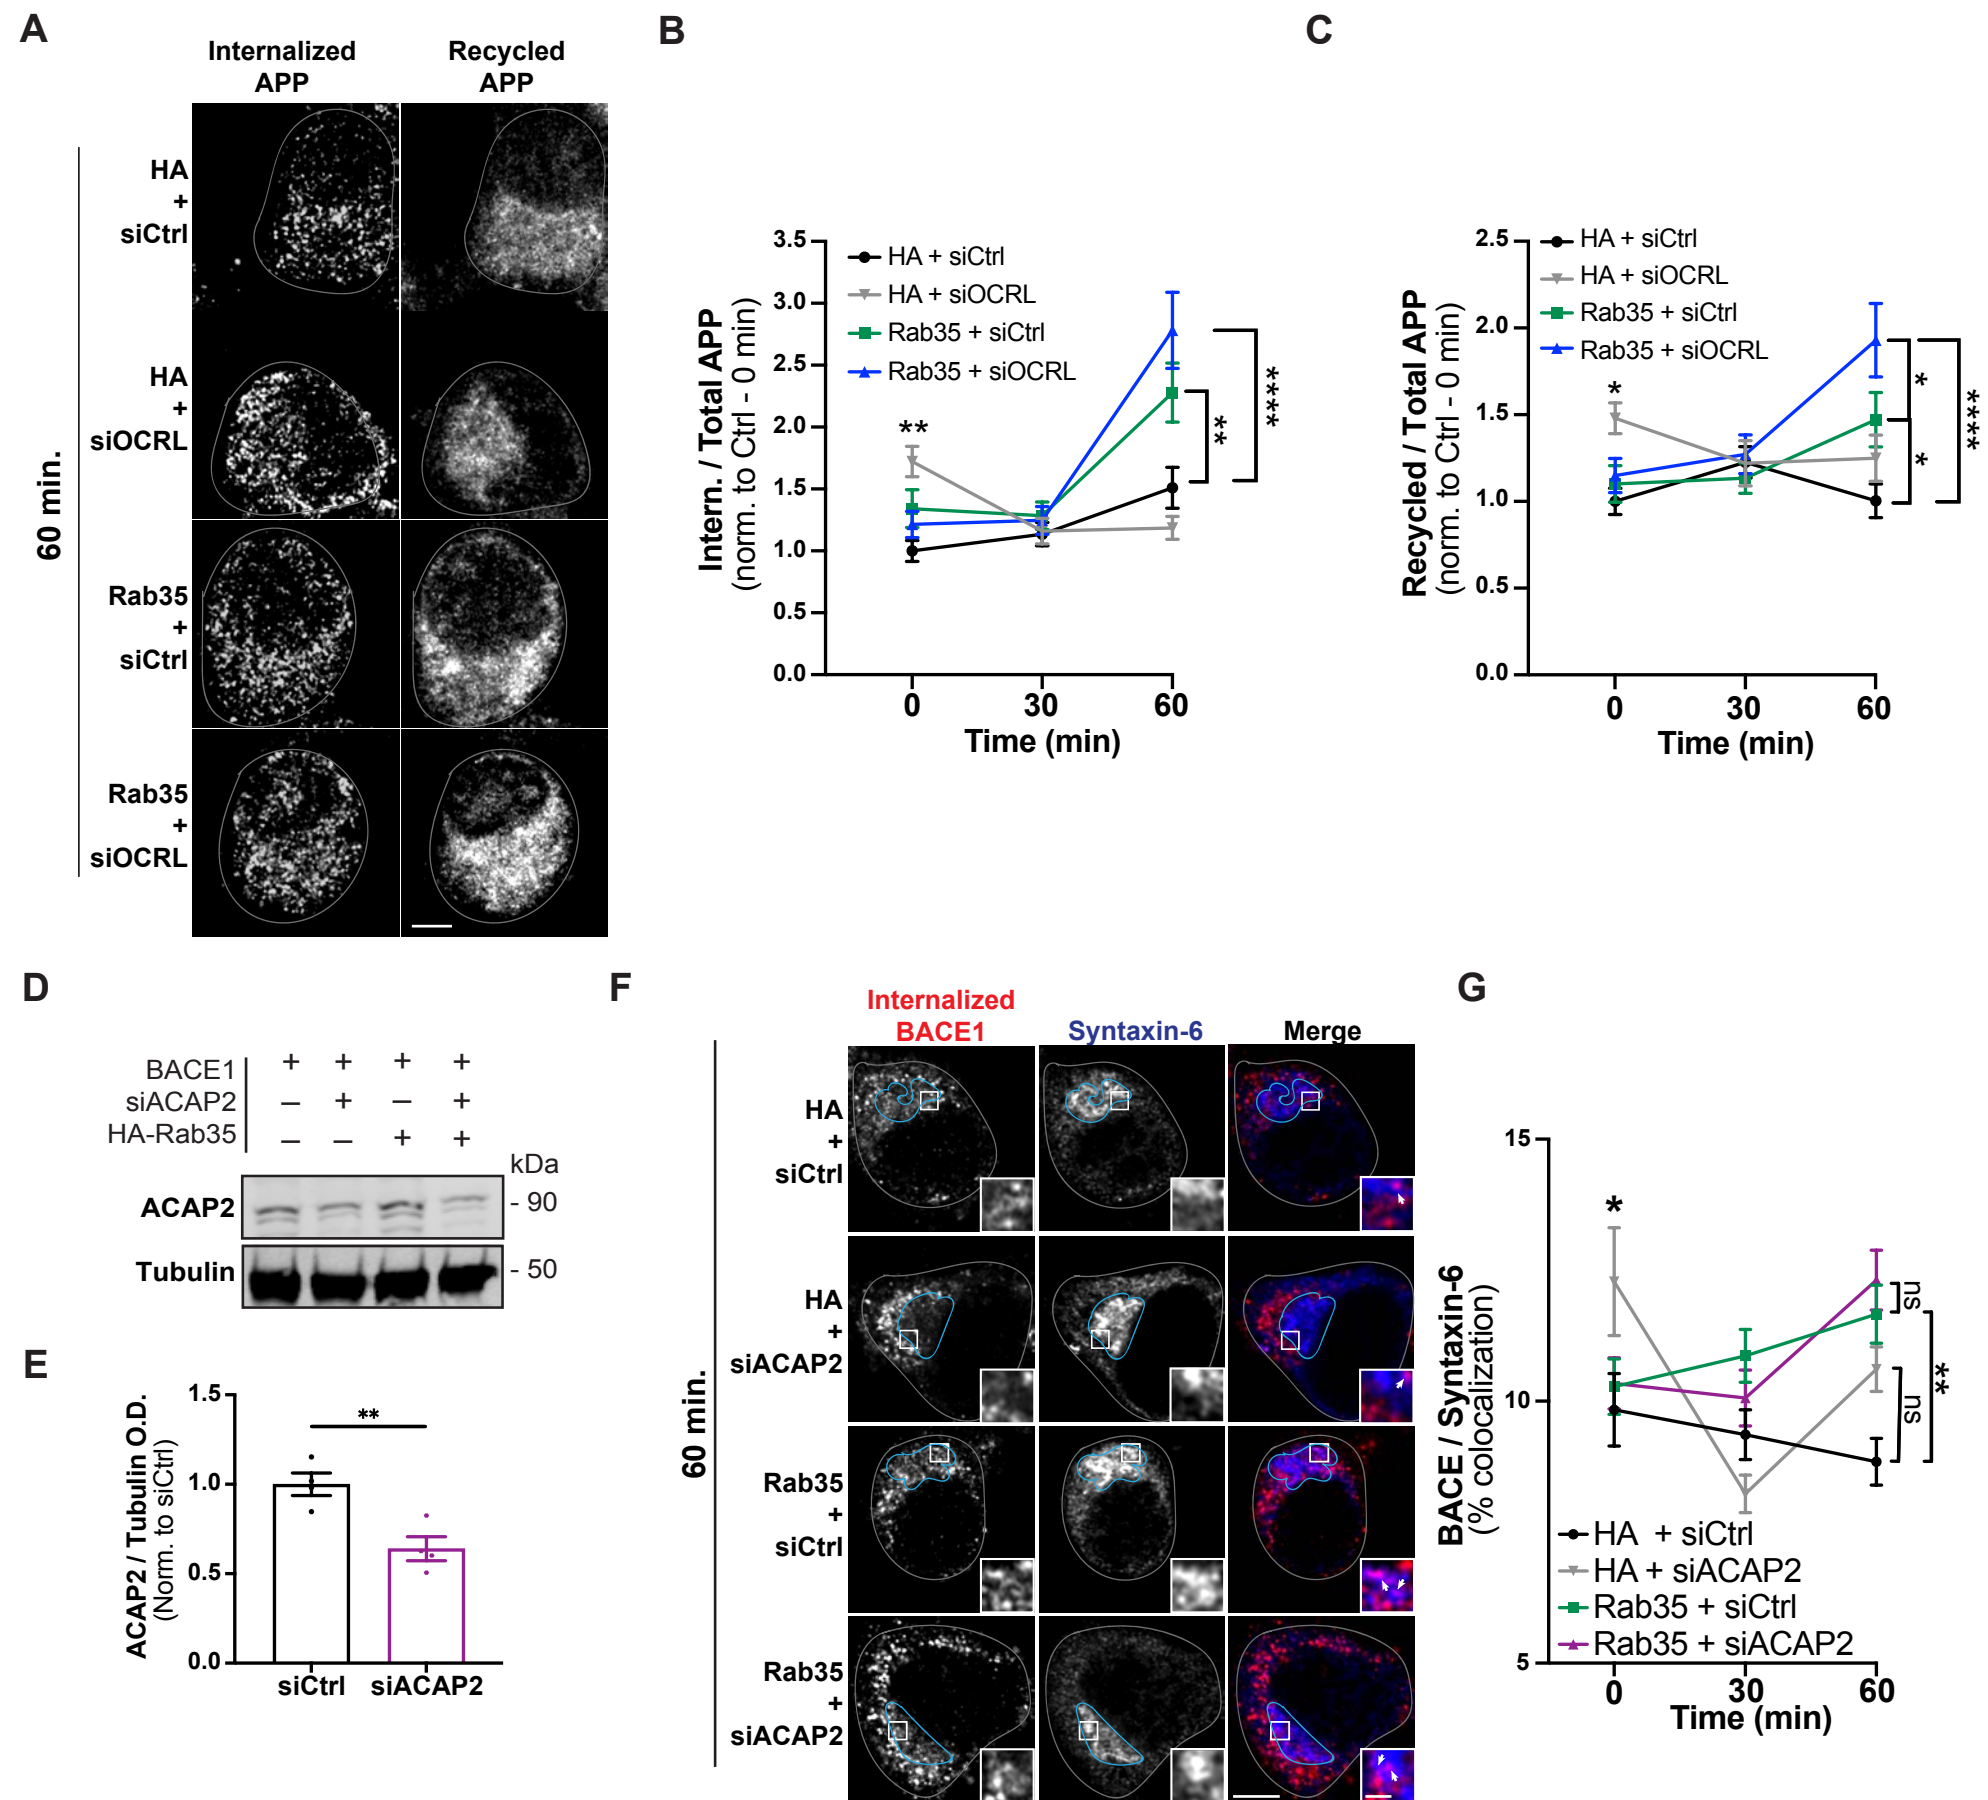

Figure S7

**A**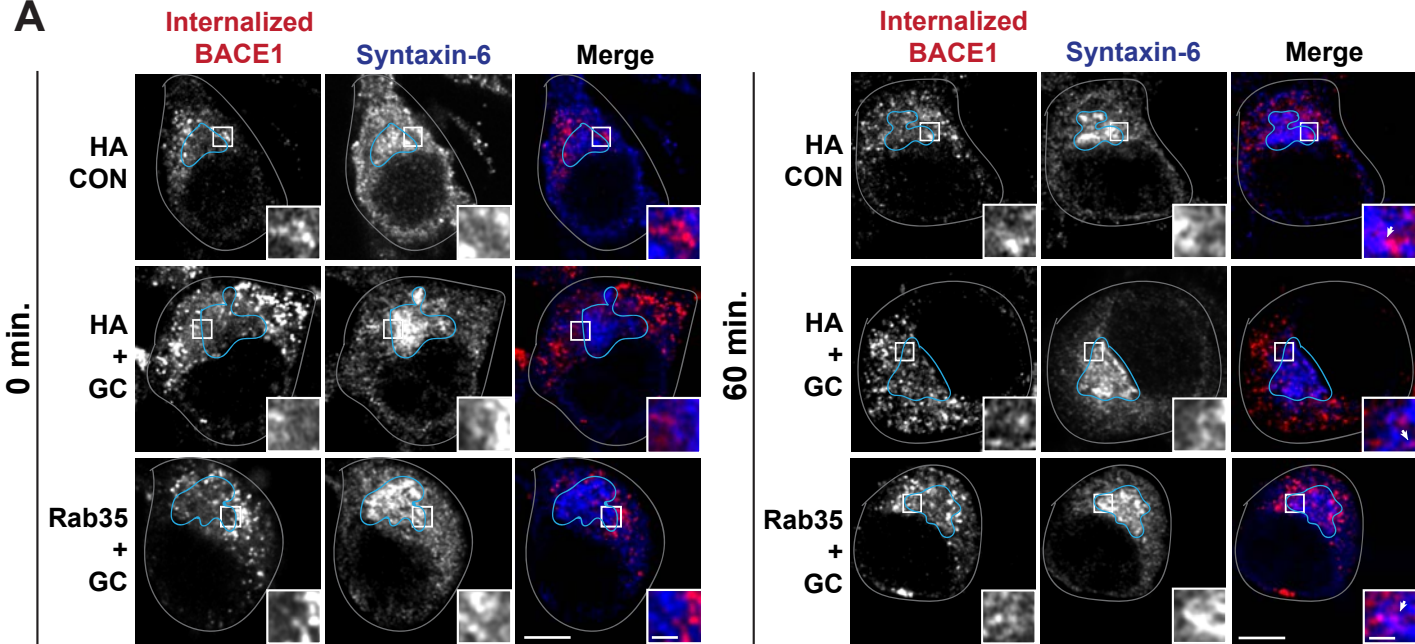**B**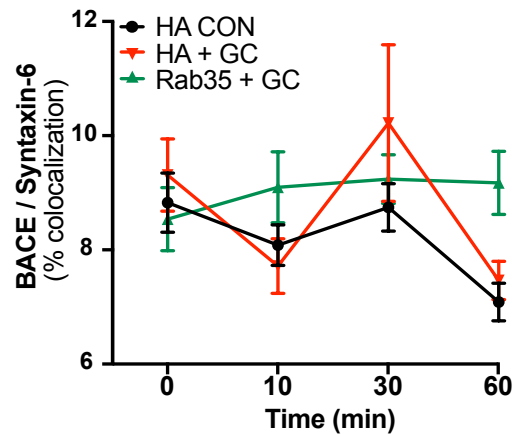

Supplement: 41419_2021_4433_MOESM2_ESM.pdf [file 41419_2021_4433_MOESM2_ESM.pdf]
